# Supplementary material for: Resveratrol enhances the functionality and improves the regeneration of mesenchymal stem cell aggregates
Source: PubMed Central journal article supplement (PMC6026147; doi:10.1038/s12276-018-0109-y), 2018-06-27
Supplement: 12276_2018_109_MOESM1_ESM.pdf [file 12276_2018_109_MOESM1_ESM.pdf]

**Supplementary information**

**Resveratrol enhances the functionality and improves the regeneration of mesenchymal stem cell aggregates**

Yi-Jing Wang<sup>1,2,†</sup>, Pan Zhao<sup>3,4,†</sup>, Bing-Dong Sui<sup>3,†</sup>, Nu Liu<sup>3,5</sup>, Cheng-Hu Hu<sup>3,4</sup>, Ji Chen<sup>3</sup>, Chen-Xi Zheng<sup>3</sup>, An-Qi Liu<sup>3</sup>, Kun Xuan<sup>3</sup>, Ya-Ping Pan<sup>1,\*</sup>, and Yan Jin<sup>3,\*</sup>

<sup>1</sup> Department of Periodontics and Oral Biology, School of Stomatology, China Medical University, Shenyang, Liaoning 110002, China.

<sup>2</sup> General Hospital of Shenyang Military Region, Shenyang, Liaoning 110016, China.

<sup>3</sup> State Key Laboratory of Military Stomatology & National Clinical Research Center for Oral Diseases & Shaanxi International Joint Research Center for Oral Diseases, Center for Tissue Engineering, School of Stomatology, Fourth Military Medical University, Xi'an, Shaanxi 710032, China.

<sup>4</sup> Xi'an Institute of Tissue Engineering and Regenerative Medicine, Xi'an, Shaanxi 710032, China.

<sup>5</sup> Department of Periodontology, Stomatological Hospital, Zunyi Medical College, Zunyi, Guizhou 563003, China.

† Equal contribution; \* Corresponding authors.

**Journal:** Experimental & Molecular Medicine.

**Supplementary information:** 2 figures with their legends.

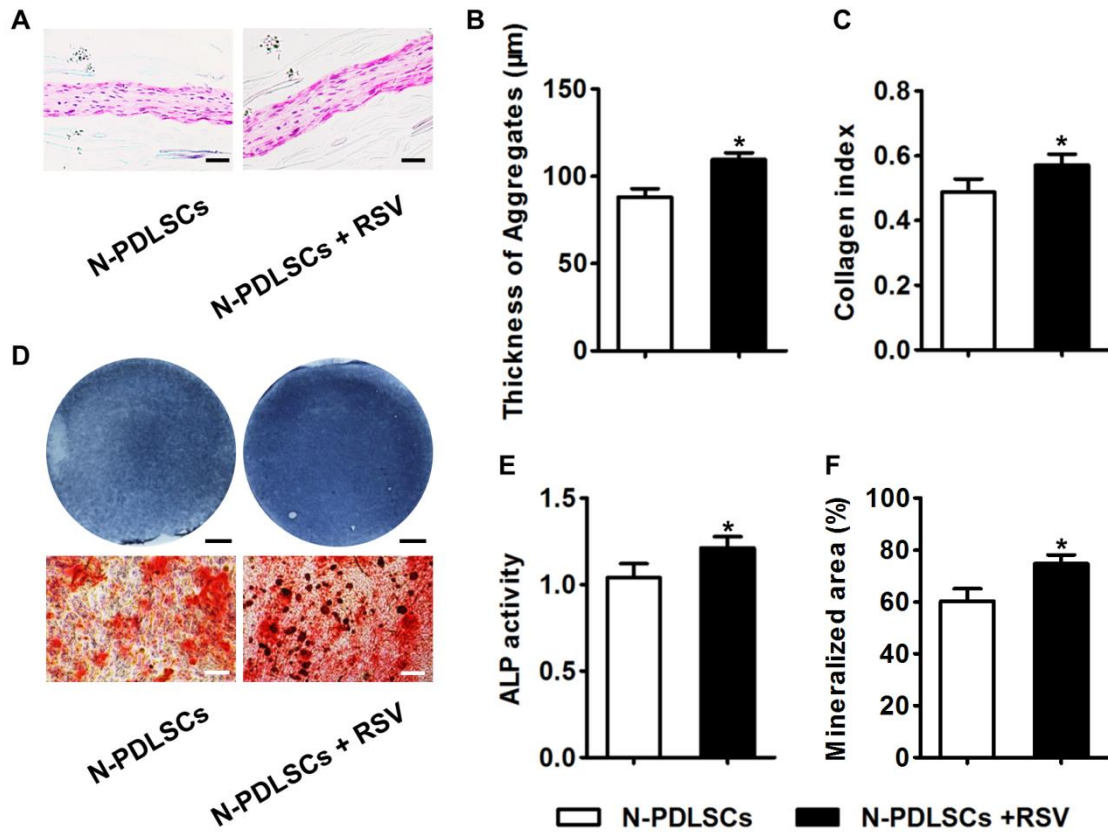

Figure S1. Resveratrol (RSV) treatment improved N-PDLSC-aggregate formation and osteogenic potential. (A-C) Histological analysis of PDLSC-aggregates (A) showed that N-PDLSCs formed thicker aggregates (B) with more collagen deposition (C) under RSV treatment. Bars: 50 µm. (D) Osteogenesis of N-PDLSC-aggregates demonstrated by alkaline phosphatase (ALP) and alizarin red staining. Bars: 5 mm (up) and 50 µm (down). (E, F) N-PDLSC-aggregates showed higher ALP activity (E) and stronger mineralized capability (F) in osteogenic differentiation under RSV treatment. RSV was applied at 10 nM throughout the *in vitro* treatments.  $n = 3$  per group. Data represents mean  $\pm$  standard deviation (SD). \* $P < 0.05$ .

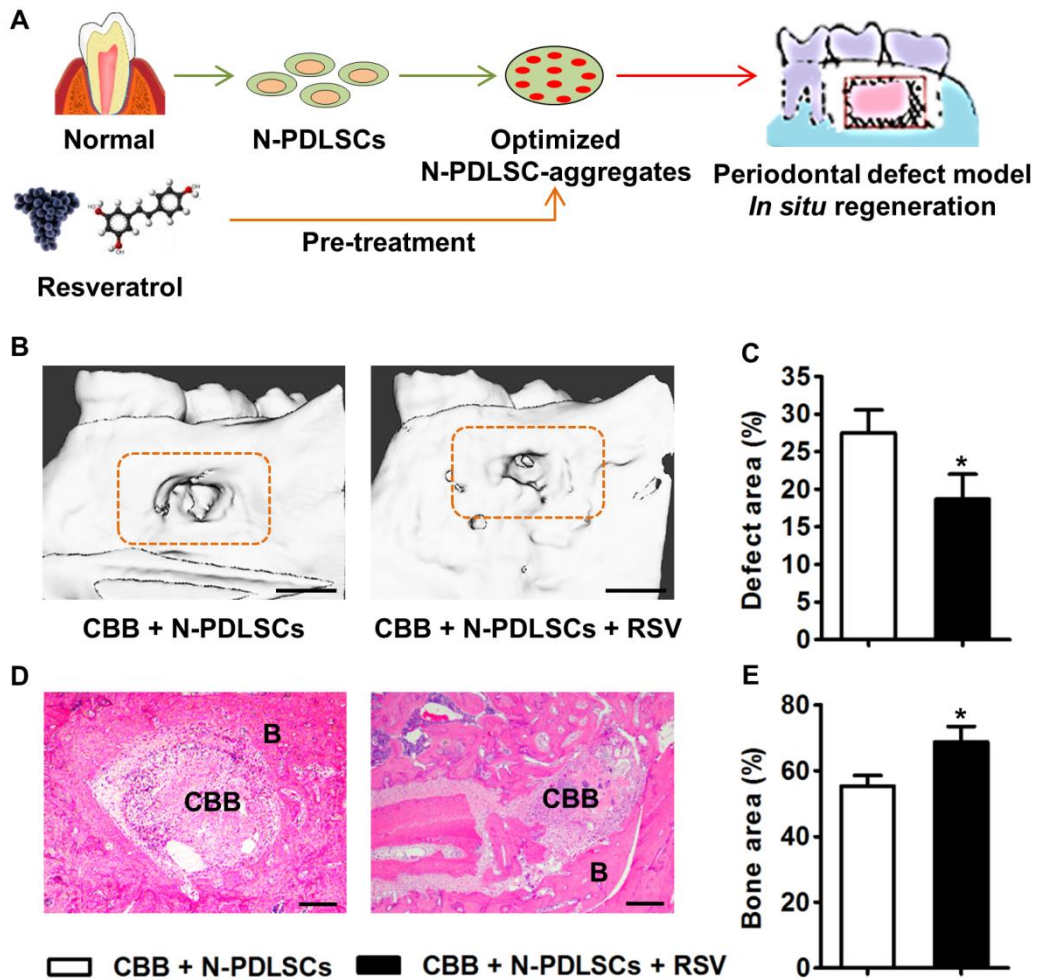

Figure S2. RSV treatment facilitated alveolar bone regeneration of N-PDLSC-aggregates in a rat periodontal defect model. (A) A schema illustrating the experimental design. (B, C) Representative micro-CT figures of periodontal defects after N-PDLSC-aggregate-based regeneration (B) and statistical analysis of bone volume per tissue volume (BV/TV) (C). The orange brackets indicate the original defects that were selected as region of interests in statistical analysis. (D, E) Histological analysis of periodontal bone regeneration (denoted by B) by N-PDLSC-aggregates by HE staining and the statistical analysis of regenerated bone area (E). RSV was applied at 10 nM throughout the *in vitro* treatments. Calcined bovine bone (CBB) was used as the scaffold.  $n = 4$  per group. Data represents mean  $\pm$  SD. \* $P < 0.05$ .
